# Supplementary material for: Real-World Utilization and Safety of Daratumumab IV Rapid Infusions Administered in a Community Setting: A Retrospective Observational Study
Source: PubMed Central journal article supplement — Drugs Real World Outcomes. 2021 Feb 9;8(2):187–95. doi: 10.1007/s40801-020-00226-3 (PMC8128966; doi:10.1007/s40801-020-00226-3), 2021-02-09
Supplement: 40801_2020_226_MOESM1_ESM.pdf [file 40801_2020_226_MOESM1_ESM.pdf]

**Journal:** *Drugs - Real World Outcomes*

**Article title:** Real-World Utilization and Safety of Daratumumab IV Rapid Infusions Administered in a Community Setting: A Retrospective Observational Study

**Running head:** Real-world utilization of daratumumab rapid infusions

**Authors:** Lucio Gordan, MD<sup>1</sup>; Melody Chang, RPh<sup>1</sup>; Marie-Hélène Lafeuille, MA<sup>2</sup>; Hela Romdhani, PhD<sup>2</sup>; Fuad Paramasivam, BA<sup>2</sup>; Eric M. Maiese, PhD<sup>3</sup>, Caroline McKay, PhD<sup>3</sup>

<sup>1</sup> Florida Cancer Specialists, Gainesville Florida, United States

<sup>2</sup> Analysis Group, Inc., Montreal Quebec, Canada

<sup>3</sup> Janssen Scientific Affairs, LLC, Horsham New Jersey, United States

**Corresponding author email:** Marie-Helene.Lafeuille@analysisgroup.com

**Supplemental Table 1. Non-infusion reaction adverse events<sup>a</sup>**

|                                                                                             | <b>N = 147</b>                        |
|---------------------------------------------------------------------------------------------|---------------------------------------|
| <b>Number of patients with <math>\geq 1</math> non-IR AE, n (%)</b>                         | <b>15 (10.2%)</b>                     |
| <b>Number of non-IR AEs per patient,<sup>b</sup> mean <math>\pm</math> SD [median; IQR]</b> | <b>1.9 <math>\pm</math> 1.2 [2;2]</b> |
| <b>Non-IR AEs, n (%)</b>                                                                    |                                       |
| Gastrointestinal toxicities                                                                 | 4 (2.7%)                              |
| Constipation                                                                                | 1 (0.7%)                              |
| Diarrhea                                                                                    | 1 (0.7%)                              |
| Nausea                                                                                      | 2 (1.4%)                              |
| Vomiting                                                                                    | 2 (1.4%)                              |
| General disorders and administration site conditions                                        | 8 (5.4%)                              |
| Fatigue                                                                                     | 8 (5.4%)                              |
| Pyrexia                                                                                     | 1 (0.7%)                              |
| Edema peripheral                                                                            | 0 (0.0%)                              |
| Chills                                                                                      | 0 (0.0%)                              |
| Laboratory abnormalities                                                                    | 1 (0.7%)                              |
| Anemia                                                                                      | 0 (0.0%)                              |
| Cytopenia                                                                                   | 0 (0.0%)                              |
| Lymphopenia                                                                                 | 0 (0.0%)                              |
| Neutropenia                                                                                 | 1 (0.7%)                              |
| Thrombocytopenia                                                                            | 0 (0.0%)                              |
| Metabolism and nutrition disorder                                                           | 1 (0.7%)                              |
| Decreased appetite                                                                          | 1 (0.7%)                              |

|                                                 |          |
|-------------------------------------------------|----------|
| Musculoskeletal and connective tissue disorders | 2 (1.4%) |
| Muscle spasms                                   | 1 (0.7%) |
| Back pain                                       | 0 (0.0%) |
| Arthralgia                                      | 1 (0.7%) |
| Musculoskeletal chest pain                      | 0 (0.0%) |
| Nervous system disorder                         | 0 (0.0%) |
| Headache                                        | 0 (0.0%) |
| Peripheral sensory neuropathy                   | 0 (0.0%) |
| Respiratory, thoracic and mediastinal disorders | 0 (0.0%) |
| Cough                                           | 0 (0.0%) |
| Dyspnea                                         | 0 (0.0%) |
| Nasal congestion                                | 0 (0.0%) |
| Vascular disorder                               | 0 (0.0%) |
| Hypertension                                    | 0 (0.0%) |
| Hypotension                                     | 0 (0.0%) |
| Thrombosis                                      | 0 (0.0%) |
| Congestive heart failure                        | 0 (0.0%) |
| Renal toxicities                                | 0 (0.0%) |
| Other <sup>c</sup>                              | 6 (4.1%) |

---

**Abbreviations:** AE: adverse event; IQR: interquartile range; IR: infusion reaction; SD: standard deviation.

**Notes:**

- a. AEs were defined as health events explicitly attributed to daratumumab in the patient charts that did not also meet the definition of an infusion reaction.
- b. Among patients with at least one AE.
- c. The following other symptoms were reported: nosebleeds, GI bleeding, shakiness, dizziness, aches and pain, and abdominal pain.
